# Supplementary material
Source: PubMed Central journal article supplement (PMC6472919)
Supplement: NIHMS1525519-supplement-3.pdf [file NIHMS1525519-supplement-3.pdf]

| Animal | PGC Numbering | Electrode | Ramped | Normal | Any |
|--------|---------------|-----------|--------|--------|-----|
| 16A3F  | 18            | 1         | 0      | 0      | 0   |
| 16A3F  | 17            | 2         | 1      | 0      | 1   |
| 16A3F  | 16            | 3         | 1      | 0      | 1   |
| 16A3F  | 15            | 4         | 1      | 0      | 1   |
| 16A3F  | 14            | 5         | 0      | 0      | 0   |
| 16A3F  | 13            | 6         | 0      | 0      | 0   |
| 16A3F  | 12            | 7         | 0      | 0      | 0   |
| 16A3F  | 11            | 8         | 1      | 0      | 1   |
| 16A3F  | 8             | 9         | 1      | 0      | 1   |
| 16A3F  | 7             | 10        | 0      | 0      | 0   |
| 16A3F  | 6             | 11        | 1      | 0      | 1   |
| 16A3F  | 5             | 12        | 0      | 0      | 0   |
| 16A3F  | 4             | 13        | 0      | 0      | 0   |
| 16A3F  | 3             | 14        | 0      | 0      | 0   |
| 16A3F  | 2             | 15        | 0      | 0      | 0   |
| 16A3F  | 1             | 16        | 0      | 0      | 0   |
| 16A4F  | 18            | 1         | 0      | 0      | 0   |
| 16A4F  | 17            | 2         | 1      | 0      | 1   |
| 16A4F  | 16            | 3         | 1      | 0      | 1   |
| 16A4F  | 15            | 4         | 0      | 0      | 0   |
| 16A4F  | 14            | 5         | 1      | 0      | 1   |
| 16A4F  | 13            | 6         | 1      | 0      | 1   |
| 16A4F  | 12            | 7         | 1      | 0      | 1   |
| 16A4F  | 11            | 8         | 1      | 0      | 1   |
| 16A4F  | 8             | 9         | 0      | 0      | 0   |
| 16A4F  | 7             | 10        | 0      | 0      | 0   |
| 16A4F  | 6             | 11        | 0      | 0      | 0   |
| 16A4F  | 5             | 12        | 0      | 0      | 0   |
| 16A4F  | 4             | 13        | 0      | 0      | 0   |
| 16A4F  | 3             | 14        | 0      | 0      | 0   |
| 16A4F  | 2             | 15        | 0      | 0      | 0   |
| 16A4F  | 1             | 16        | 0      | 0      | 0   |
| 16A7F  | 18            | 1         | 0      | 0      | 0   |
| 16A7F  | 17            | 2         | 0      | 0      | 0   |
| 16A7F  | 16            | 3         | 0      | 0      | 0   |
| 16A7F  | 15            | 4         | 0      | 0      | 0   |
| 16A7F  | 14            | 5         | 0      | 0      | 0   |
| 16A7F  | 13            | 6         | 0      | 0      | 0   |
| 16A7F  | 12            | 7         | 0      | 0      | 0   |
| 16A7F  | 11            | 8         | 0      | 0      | 0   |
| 16A7F  | 8             | 9         | 0      | 0      | 0   |
| 16A7F  | 7             | 10        | 0      | 0      | 0   |
| 16A7F  | 6             | 11        | 0      | 0      | 0   |
| 16A7F  | 5             | 12        | 0      | 0      | 0   |
| 16A7F  | 4             | 13        | 0      | 0      | 0   |
| 16A7F  | 3             | 14        | 0      | 0      | 0   |
| 16A7F  | 2             | 15        | 0      | 0      | 0   |
| 16A7F  | 1             | 16        | 0      | 0      | 0   |
| 16A8F  | 18            | 1         | 0      | 1      | 1   |

|       |    |    |   |   |   |
|-------|----|----|---|---|---|
| 16A8F | 17 | 2  | 0 | 1 | 1 |
| 16A8F | 16 | 3  | 0 | 1 | 1 |
| 16A8F | 15 | 4  | 0 | 1 | 1 |
| 16A8F | 14 | 5  | 0 | 1 | 1 |
| 16A8F | 13 | 6  | 0 | 1 | 1 |
| 16A8F | 12 | 7  | 0 | 1 | 1 |
| 16A8F | 11 | 8  | 0 | 1 | 1 |
| 16A8F | 8  | 9  | 0 | 1 | 1 |
| 16A8F | 7  | 10 | 0 | 1 | 1 |
| 16A8F | 6  | 11 | 0 | 1 | 1 |
| 16A8F | 5  | 12 | 0 | 1 | 1 |
| 16A8F | 4  | 13 | 0 | 1 | 1 |
| 16A8F | 3  | 14 | 0 | 1 | 1 |
| 16A8F | 2  | 15 | 0 | 1 | 1 |
| 16A8F | 1  | 16 | 0 | 0 | 0 |

| Animal | Implant Date | Date of Last Data Week | Date of Last Rejuv | Date of Sacrifice | Week of Sacrifice | Days Since Rejuvenation | Days Since Last Data Week | Rejuvenation | Plasticity |
|--------|--------------|------------------------|--------------------|-------------------|-------------------|-------------------------|---------------------------|--------------|------------|
| 16A1F  | 31-05-2016   |                        |                    | 21-09-2016        | 17                |                         |                           |              |            |
| 16A2F  | 02-06-2016   |                        |                    | 21-09-2016        | 16                |                         |                           |              |            |
| 16A3F  | 19-07-2016   | 11-10-2016             | 23-01-2017         | 30-01-2017        | 28                |                         | 7                         | 111 Yes      |            |
| 16A4F  | 21-07-2016   | 11-10-2016             | 25-01-2017         | 26-01-2017        | 27                |                         | 1                         | 107 Yes      |            |
| 16A5F  | 01-11-2016   | 27-01-2017             | 27-04-2017         | 14-05-2017        | 28                |                         | 17                        | 107 Yes      |            |
| 16A6F  | 02-11-2016   |                        |                    | 18-01-2017        | 11                |                         |                           |              |            |
| 16A7F  | 01-02-2017   | 17-03-2017             |                    | 29-03-2017        | 8                 |                         |                           | 12           |            |
| 16A8F  | 08-02-2017   | 05-05-2017             | 17-08-2017         | 07-09-2017        | 31                |                         | 21                        | 125 Yes      | Yes        |
